# Supplementary material
Source: Elsevier journal article supplement (https://www.sciencedirect.com/science/article/pii/S0212656719304639)
Supplement: mmc1 [file S0212656719304639:mmc1.doc]

**MATERIAL SUPLEMENTARIO ONLINE: S1**

CONTENIDO DE LAS SESIONES

**Clase 1**

Función biológica del dolor.

Formación de redes neuronales y conexiones. Sistemas de información para la supervivencia.

Sistema de alarma: ¿cómo se activa?

Dolor no es igual a daño. El dolor no refleja el estado de los tejidos.

Respuestas de defensa: dolor, fatiga, enfermedad, ...

Mi cerebro y yo.

Nuevas técnicas de neuroimagen: El dolor es real.

**Clase 2**

Sensación y percepción. El dolor como percepción

Nocicepción y dolor.

Propiocepción y conciencia del movimiento.

Mapas cerebrales. El cuerpo virtual. La imprecisión.

Percepción de salud y percepción de enfermedad.

Error de evaluación cerebral, el cerebro se equivoca.

**Clase 3**

Memorias de dolor.

El cerebro procesa información y hace predicciones de peligrosidad.

Neuroetiqueta del dolor.

Respuesta cerebral de defensa.

La fibromialgia como sensibilización central, estado de alerta mantenido.

**Clase 4**

Las expectativas.

Efecto nocebo. Efecto anti-nocebo. Papel de la información y la cultura.

Neuronas espejo: el dolor se aprende.

Las creencias. El cerebro social.

¿Existen malas posturas? ¿Hay movimientos peligrosos?

Otros síntomas relacionados: mareo, problemas con el sueño.

El sistema de recompensa cerebral.

Descatalogando peligros erróneos.

Neuroplasticidad. Los “puedo”.

**Clase 5**

Descatalogando amenazas en la vida cotidiana. Desactivando alarmas.

Cerebro para el movimiento, para modificar el mundo que nos rodea.

¿Miedo al movimiento?

Desactivando patrones de protección. Desaprender conscientemente.

Activando el cuerpo virtual.

Consciencia corporal. Sentir el cuerpo. Sentir el movimiento.

Exposición gradual al movimiento. Recuperar la confianza en el cuerpo.

**Clase 6.**

Repaso de conceptos desde las experiencias de los participantes.
